# Supplementary material for: Estimated dietary dioxin exposure and breast cancer risk among women from the French E3N prospective cohort
Source: PubMed Central journal article supplement (PMC4362830; doi:10.1186/s13058-015-0536-9), 2015-03-17
Supplement: 13058_2015_536_MOESM1_ESM.pdf [file 13058_2015_536_MOESM1_ESM.pdf]

Additional File 1

Table S1. Dioxin contamination and lipids proportion of food items from the E3N diet history questionnaire of 1993.

| <b>Food groups</b>      | <b>Food items</b> | <b>Dioxin contamination level (pg I-TEQ/g lipid weight or <i>fresh weight</i>)<sup>a</sup></b> | <b>Lipids proportion (%)<sup>c</sup></b> |
|-------------------------|-------------------|------------------------------------------------------------------------------------------------|------------------------------------------|
| <b>Meat</b>             | Beef              | 0.80                                                                                           | 8.86                                     |
|                         | Horse             | 0.60 <sup>b</sup>                                                                              | 4.60                                     |
|                         | Lamb              | 0.74                                                                                           | 14.09                                    |
|                         | Calf              | 0.48                                                                                           | 5.12                                     |
|                         | Pork              | 0.16                                                                                           | 11.04                                    |
|                         | Offal             | 3.32                                                                                           | 15.42                                    |
|                         | Charcuterie       | 0.25                                                                                           | 16.41                                    |
|                         | Poultry           | 0.60                                                                                           | 6.76                                     |
|                         | Rabbit            | 0.60 <sup>b</sup>                                                                              | 8.70                                     |
| <b>Cereal products</b>  | Pasta             | 0.01                                                                                           | -                                        |
|                         | Rice              | 0.01                                                                                           | -                                        |
|                         | Cereals           | 0.02                                                                                           | -                                        |
|                         | Bread             | 0.01                                                                                           | -                                        |
|                         | Biscuits/cakes    | 0.0125                                                                                         | -                                        |
| <b>Eggs</b>             | Eggs              | 1.51                                                                                           | 10.50                                    |
| <b>Fish and Seafood</b> | Trout             | 9.36                                                                                           | 4.20                                     |
|                         | Sardines          | 2.70                                                                                           | 12.30                                    |
|                         | Colin/hake        | 2.24                                                                                           | 1.00                                     |
|                         | Ling              | 4.64 <sup>b</sup>                                                                              | 1.00                                     |
|                         | Mackerel          | 3.23                                                                                           | 20.90                                    |
|                         | Flounder          | 4.64 <sup>b</sup>                                                                              | 1.00                                     |
|                         | Haddock           | 4.64 <sup>b</sup>                                                                              | 1.00                                     |
|                         | Sole              | 4.64 <sup>b</sup>                                                                              | 1.00                                     |
|                         | Saithe            | 3.38                                                                                           | 1.00                                     |
|                         | Whiting           | 34.16                                                                                          | 0.90                                     |
|                         | Cod               | 8.45                                                                                           | 0.95                                     |
|                         | Salmon            | 5.15                                                                                           | 10.78                                    |
|                         | Saumonette        | 4.64 <sup>b</sup>                                                                              | 16.30                                    |
|                         | Other fish        | 5.13                                                                                           | 4.18                                     |
|                         | Canned fish       | 4.64 <sup>b</sup>                                                                              | 8.50                                     |
|                         | Seafood           | 30.22                                                                                          | 2.77                                     |
| <b>Dairy products</b>   | Milk              | 0.65                                                                                           | 2.32                                     |
|                         | Butter            | 0.92                                                                                           | 68.67                                    |
|                         | Pressed cheese    | 0.64                                                                                           | 29.25                                    |
|                         | Other cheese      | 0.77                                                                                           | 30.10                                    |
|                         | Cream             | 0.68                                                                                           | 27.00                                    |
|                         | Fromage blanc     | 1.16                                                                                           | 3.35                                     |

|                             |                      |                    |       |
|-----------------------------|----------------------|--------------------|-------|
|                             | Dairy dessert        | 1.16               | 5.04  |
|                             | Yogurt               | 1.16               | 1.80  |
| <b>Fruit and vegetables</b> | Fruits               | 0.01               | -     |
|                             | Leafy vegetables     | 0.055              | -     |
|                             | Root vegetables      | 0.01               | -     |
|                             | Other vegetables     | 0.032              | -     |
|                             | Soup                 | 0.034 <sup>b</sup> | -     |
| <b>Added fats</b>           | Animal fats          | 0.88               | 99.75 |
|                             | Peanut oil           | 0.03               | 83.25 |
|                             | Olive oil            | 0.04               | 83.25 |
|                             | Margarine            | 0.04               | 61.99 |
|                             | Sunflower oil        | 0.04 <sup>b</sup>  | 83.25 |
|                             | Corn oil             | 0.04 <sup>b</sup>  | 83.25 |
|                             | Other vegetable fats | 0.04 <sup>b</sup>  | 70.75 |
|                             | Mayonnaise           | 0.04 <sup>b</sup>  | 78.60 |

<sup>a</sup> Dioxin contamination data of 1996-1998 provided by the French High Council for Public

5 Health (Conseil Supérieur d'Hygiène Publique de France).

<sup>b</sup> The average dioxin contamination of the food group was assigned to the food item.

<sup>c</sup> Lipids proportion provided by the food composition table developed by the E3N team.

Table S2. Hazards ratios (HR) for invasive breast cancer in subgroups defined by body mass

10 index, weight change, dietary patterns and breastfeeding (N=63,830), 1993-2008.

| Stratifications                   | Dietary dioxin exposure (pg/kg body weight/day) |             |                   |                   |                   | p-trend |
|-----------------------------------|-------------------------------------------------|-------------|-------------------|-------------------|-------------------|---------|
|                                   | /0.43                                           | <0.98 (ref) | [0.98,1.23[       | [1.23,1.52[       | ≥1.52             |         |
| <b>Body Mass Index (BMI)</b>      |                                                 |             |                   |                   |                   |         |
| <b>BMI&lt;25 kg/m<sup>2</sup></b> |                                                 |             |                   |                   |                   |         |
| N cases                           | 2778                                            | 600         | 684               | 706               | 788               |         |
| HR (95% CI) <sup>a</sup>          | 1.01 (0.97, 1.05)                               | 1.00        | 0.99 (0.89, 1.11) | 0.96 (0.86, 1.07) | 1.01 (0.91, 1.13) | 0.5931  |
| HR (95% CI) <sup>b</sup>          | 0.98 (0.93, 1.03)                               | 1.00        | 0.96 (0.86, 1.07) | 0.90 (0.80, 1.02) | 0.93 (0.81, 1.06) | 0.4682  |
| <b>BMI≥25 kg/m<sup>2</sup></b>    |                                                 |             |                   |                   |                   |         |
| N cases                           | 687                                             | 280         | 169               | 142               | 96                |         |
| HR (95% CI) <sup>a</sup>          | 1.01 (0.93, 1.10)                               | 1.00        | 0.87 (0.72, 1.06) | 0.99 (0.81, 1.21) | 0.99 (0.78, 1.25) | 0.7633  |
| HR (95% CI) <sup>b</sup>          | 1.00 (0.89, 1.12)                               | 1.00        | 0.85 (0.69, 1.04) | 0.94 (0.75, 1.18) | 0.94 (0.70, 1.26) | 0.9875  |
| <b>Weight change<sup>c</sup></b>  |                                                 |             |                   |                   |                   |         |
| <b>Weight loss</b>                |                                                 |             |                   |                   |                   |         |
| <b>(&gt;-2 kg/5 years)</b>        |                                                 |             |                   |                   |                   |         |
| N cases                           | 211                                             | 56          | 59                | 47                | 49                |         |
| HR (95% CI) <sup>a</sup>          | 1.03 (0.91, 1.18)                               | 1.00        | 1.19 (0.83, 1.72) | 1.06 (0.72, 1.57) | 1.12 (0.77, 1.65) | 0.6288  |
| HR (95% CI) <sup>b</sup>          | 1.00 (0.84, 1.19)                               | 1.00        | 1.11 (0.76, 1.63) | 1.00 (0.65, 1.54) | 1.01 (0.62, 1.64) | 0.9796  |
| <b>Stable weight</b>              |                                                 |             |                   |                   |                   |         |
| <b>([-2;2] kg/5 years)</b>        |                                                 |             |                   |                   |                   |         |
| N cases                           | 2014                                            | 501         | 482               | 498               | 533               |         |
| HR (95% CI) <sup>a</sup>          | 1.00 (0.95, 1.04)                               | 1.00        | 0.90 (0.80, 1.02) | 0.89 (0.79, 1.01) | 0.95 (0.84, 1.07) | 0.9628  |
| HR (95% CI) <sup>b</sup>          | 1.00 (0.94, 1.07)                               | 1.00        | 0.89 (0.78, 1.01) | 0.88 (0.76, 1.01) | 0.92 (0.79, 1.08) | 0.9213  |
| <b>Weight gain</b>                |                                                 |             |                   |                   |                   |         |
| <b>(&gt;2 kg/5 years)</b>         |                                                 |             |                   |                   |                   |         |
| N cases                           | 1234                                            | 320         | 310               | 303               | 301               |         |
| HR (95% CI) <sup>a</sup>          | 1.04 (0.99, 1.10)                               | 1.00        | 1.04 (0.89, 1.22) | 1.09 (0.93, 1.27) | 1.13 (0.96, 1.32) | 0.1350  |
| HR (95% CI) <sup>b</sup>          | 1.00 (0.93, 1.08)                               | 1.00        | 1.00 (0.85, 1.18) | 1.00 (0.84, 1.19) | 1.02 (0.83, 1.25) | 0.9893  |
| <b>Western Pattern</b>            |                                                 |             |                   |                   |                   |         |
| <b>Low intake</b>                 |                                                 |             |                   |                   |                   |         |
| N cases                           | 1059                                            | 483         | 299               | 198               | 79                |         |
| HR (95% CI) <sup>a</sup>          | 0.99 (0.91, 1.07)                               | 1.00        | 1.03 (0.89, 1.19) | 1.12 (0.95, 1.33) | 0.96 (0.75, 1.22) | 0.7361  |
| HR (95% CI) <sup>b</sup>          | 0.98 (0.88, 1.08)                               | 1.00        | 1.03 (0.89, 1.20) | 1.12 (0.94, 1.34) | 0.97 (0.76, 1.24) | 0.6586  |
| <b>Medium intake</b>              |                                                 |             |                   |                   |                   |         |

|                          |                   |      |                   |                   |                   |        |
|--------------------------|-------------------|------|-------------------|-------------------|-------------------|--------|
| N cases                  | 1163              | 274  | 321               | 349               | 219               |        |
| HR (95% CI) <sup>a</sup> | 0.96 (0.89, 1.03) | 1.00 | 0.87 (0.74, 1.02) | 0.95 (0.81, 1.11) | 0.81 (0.67, 0.96) | 0.2150 |
| HR (95% CI) <sup>b</sup> | 0.94 (0.86, 1.02) | 1.00 | 0.85 (0.73, 1.01) | 0.93 (0.79, 1.09) | 0.78 (0.65, 0.95) | 0.1438 |
| <b>High intake</b>       |                   |      |                   |                   |                   |        |
| N cases                  | 1243              | 110  | 222               | 386               | 525               |        |
| HR (95% CI) <sup>a</sup> | 0.98 (0.93, 1.03) | 1.00 | 0.92 (0.73, 1.15) | 0.94 (0.76, 1.16) | 0.85 (0.69, 1.05) | 0.4446 |
| HR (95% CI) <sup>b</sup> | 1.02 (0.96, 1.09) | 1.00 | 0.94 (0.74, 1.18) | 0.98 (0.78, 1.21) | 0.89 (0.72, 1.11) | 0.4666 |
| <b>Healthy pattern</b>   |                   |      |                   |                   |                   |        |
| <b>Low intake</b>        |                   |      |                   |                   |                   |        |
| N cases                  | 1166              | 375  | 292               | 287               | 212               |        |
| HR (95% CI) <sup>a</sup> | 1.01 (0.94, 1.08) | 1.00 | 0.96 (0.82, 1.12) | 1.06 (0.91, 1.24) | 0.88 (0.74, 1.05) | 0.8799 |
| HR (95% CI) <sup>b</sup> | 1.00 (0.91, 1.10) | 1.00 | 0.93 (0.80, 1.09) | 1.02 (0.86, 1.20) | 0.83 (0.69, 1.01) | 0.9751 |
| <b>Medium intake</b>     |                   |      |                   |                   |                   |        |
| N cases                  | 1164              | 290  | 292               | 319               | 263               |        |
| HR (95% CI) <sup>a</sup> | 0.98 (0.92, 1.05) | 1.00 | 1.00 (0.85, 1.18) | 1.05 (0.90, 1.23) | 0.92 (0.78, 1.10) | 0.6134 |
| HR (95% CI) <sup>b</sup> | 1.00 (0.91, 1.09) | 1.00 | 1.00 (0.85, 1.18) | 1.04 (0.87, 1.23) | 0.90 (0.74, 1.09) | 0.9096 |
| <b>High intake</b>       |                   |      |                   |                   |                   |        |
| N cases                  | 1135              | 202  | 258               | 327               | 348               |        |
| HR (95% CI) <sup>a</sup> | 1.06 (1.01, 1.12) | 1.00 | 1.08 (0.90, 1.30) | 1.24 (1.04, 1.48) | 1.23 (1.03, 1.46) | 0.0248 |
| HR (95% CI) <sup>b</sup> | 1.05 (0.98, 1.13) | 1.00 | 1.06 (0.88, 1.28) | 1.21 (1.00, 1.46) | 1.17 (0.95, 1.43) | 0.1574 |
| <b>Breastfeeding</b>     |                   |      |                   |                   |                   |        |
| <b>No breastfeeding</b>  |                   |      |                   |                   |                   |        |
| N cases                  | 1483              | 382  | 366               | 371               | 364               |        |
| HR (95% CI) <sup>a</sup> | 1.02 (0.97, 1.07) | 1.00 | 1.00 (0.87, 1.15) | 1.03 (0.89, 1.19) | 1.02 (0.88, 1.18) | 0.4492 |
| HR (95% CI) <sup>b</sup> | 1.02 (0.95, 1.09) | 1.00 | 0.97 (0.84, 1.13) | 0.99 (0.84, 1.16) | 0.99 (0.82, 1.19) | 0.6577 |
| <b>Breastfeeding</b>     |                   |      |                   |                   |                   |        |
| N cases                  | 1982              | 497  | 488               | 477               | 520               |        |
| HR (95% CI) <sup>a</sup> | 1.01 (0.97, 1.06) | 1.00 | 0.95 (0.84, 1.07) | 0.92 (0.81, 1.04) | 1.01 (0.89, 1.14) | 0.6589 |
| HR (95% CI) <sup>b</sup> | 0.99 (0.93, 1.05) | 1.00 | 0.92 (0.81, 1.05) | 0.88 (0.76, 1.01) | 0.94 (0.80, 1.11) | 0.7427 |
| <b>Smoking Status</b>    |                   |      |                   |                   |                   |        |
| <b>Non-smoker</b>        |                   |      |                   |                   |                   |        |
| N cases                  | 1861              | 492  | 469               | 431               | 469               |        |
| HR (95% CI) <sup>a</sup> | 1.00 (0.96, 1.05) | 1.00 | 0.96 (0.84, 1.09) | 0.88 (0.77, 1.00) | 0.99 (0.87, 1.12) | 0.9040 |
| HR (95% CI) <sup>b</sup> | 0.99 (0.92, 1.05) | 1.00 | 0.93 (0.81, 1.06) | 0.83 (0.72, 0.96) | 0.92 (0.78, 1.09) | 0.6414 |
| <b>Former smoker</b>     |                   |      |                   |                   |                   |        |
| N cases                  | 1158              | 278  | 273               | 309               | 298               |        |
| HR (95% CI) <sup>a</sup> | 1.03 (0.97, 1.09) | 1.00 | 0.95 (0.81, 1.13) | 1.09 (0.92, 1.28) | 1.05 (0.89, 1.23) | 0.2918 |

|                       |                          |                   |      |                   |                   |                   |        |
|-----------------------|--------------------------|-------------------|------|-------------------|-------------------|-------------------|--------|
|                       | HR (95% CI) <sup>b</sup> | 1.03 (0.95, 1.11) | 1.00 | 0.94 (0.79, 1.12) | 1.07 (0.89, 1.28) | 1.03 (0.84, 1.27) | 0.4625 |
| <b>Smoker</b>         |                          |                   |      |                   |                   |                   |        |
|                       | N cases                  | 446               | 109  | 112               | 108               | 117               |        |
|                       | HR (95% CI) <sup>a</sup> | 1.01 (0.93, 1.11) | 1.00 | 1.07 (0.82, 1.39) | 1.03 (0.79, 1.34) | 1.05 (0.81, 1.36) | 0.7549 |
|                       | HR (95% CI) <sup>b</sup> | 1.00 (0.88, 1.13) | 1.00 | 1.03 (0.78, 1.36) | 0.97 (0.72, 1.30) | 0.98 (0.70, 1.37) | 0.9852 |
| <b>Alcohol intake</b> |                          |                   |      |                   |                   |                   |        |
| <b>0 g/day</b>        |                          |                   |      |                   |                   |                   |        |
|                       | N cases                  | 375               | 134  | 90                | 68                | 83                |        |
|                       | HR (95% CI) <sup>a</sup> | 1.08 (0.98, 1.19) | 1.00 | 0.86 (0.66, 1.13) | 0.78 (0.58, 1.05) | 1.21 (0.92, 1.59) | 0.1448 |
|                       | HR (95% CI) <sup>b</sup> | 1.02 (0.89, 1.17) | 1.00 | 0.79 (0.60, 1.04) | 0.68 (0.49, 0.94) | 0.99 (0.69, 1.42) | 0.7708 |
| <b>&lt;6.9 g/day</b>  |                          |                   |      |                   |                   |                   |        |
|                       | N cases                  | 1234              | 348  | 338               | 294               | 254               |        |
|                       | HR (95% CI) <sup>a</sup> | 0.99 (0.93, 1.05) | 1.00 | 1.02 (0.88, 1.19) | 0.96 (0.82, 1.12) | 0.96 (0.81, 1.12) | 0.6697 |
|                       | HR (95% CI) <sup>b</sup> | 1.00 (0.92, 1.08) | 1.00 | 1.03 (0.88, 1.20) | 0.96 (0.81, 1.14) | 0.96 (0.78, 1.19) | 0.9285 |
| <b>≥6.9 g/day</b>     |                          |                   |      |                   |                   |                   |        |
|                       | N cases                  | 1856              | 397  | 426               | 486               | 547               |        |
|                       | HR (95% CI) <sup>a</sup> | 1.00 (0.96, 1.05) | 1.00 | 0.94 (0.82, 1.07) | 0.96 (0.84, 1.10) | 0.97 (0.86, 1.11) | 1.0000 |
|                       | HR (95% CI) <sup>b</sup> | 1.01 (0.95, 1.07) | 1.00 | 0.92 (0.80, 1.06) | 0.95 (0.82, 1.11) | 0.97 (0.82, 1.15) | 0.8817 |

<sup>a</sup> age-adjusted models.

<sup>b</sup> adjusted for age, height, body mass index, energy intake, education, physical activity, smoking status combined with use of menopausal hormone treatment, alcohol intake, age at menarche, use of oral contraceptives, use of progestin, age at menopause, age at first full-term pregnancy and number of live births, breastfeeding, family history of breast cancer, history of personal benign breast disease and mammography.

<sup>c</sup> n=6 breast cancer cases with missing data for weight change during follow-up.
